# Supplementary material for: Preparation of hierarchical worm-like silica nanotubes
Source: Royal Society of Chemistry journal article supplement (doi:10.1039/b814617a), 2009-01-01
Supplement: b814617a.pdf [file b814617a.pdf]

## Supporting information

### Preparation of Hierarchical Worm-like Silica Nanotubes

Li-Ping Yang, Peng Zou, Cai-Yuan Pan\*

*Department of Polymer Science and Engineering, Joint Laboratory of Polymer Thin Films and Solution, University of Science and Technology of China, Hefei, Anhui 230026 (P.R. China)*

| page | Table of contents                                                                                                                                                                                                                                    |
|------|------------------------------------------------------------------------------------------------------------------------------------------------------------------------------------------------------------------------------------------------------|
| S1   | <sup>1</sup> H NMR spectrum of MWNT-g-PDMAEMA                                                                                                                                                                                                        |
| S2   | TGA curves of A: pristine MWNTs; B: MWNT-Br; C: MWNT-g-PDMAEMA. TGA was carried out at a heating rate of 10 °C /min under nitrogen.                                                                                                                  |
| S3   | XPS spectra of (A) MWNT-Br and (B) MWNT-g-PDMAEMA                                                                                                                                                                                                    |
| S4   | The SEM images of the MWNT-silica composites samples obtained from polycondensation of TEOS in aqueous solution with concentration of 12.5 mg/mL at pH=4 for 2 days (A); 4 days (B); and for 7 days, and then calcined at 550°C in air for 10 h (C). |
| S5   | Digital photos of the products, the MWNT-silica composites prepared from polycondensation of TEOS in aqueous solution with concentration of 12.5 mg/mL at pH=4 for 7 days (A); after calcined at 550°C in air for 10h (B).                           |

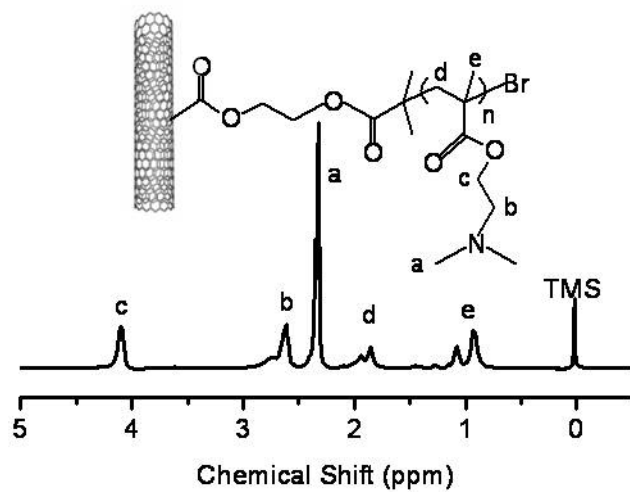

S1

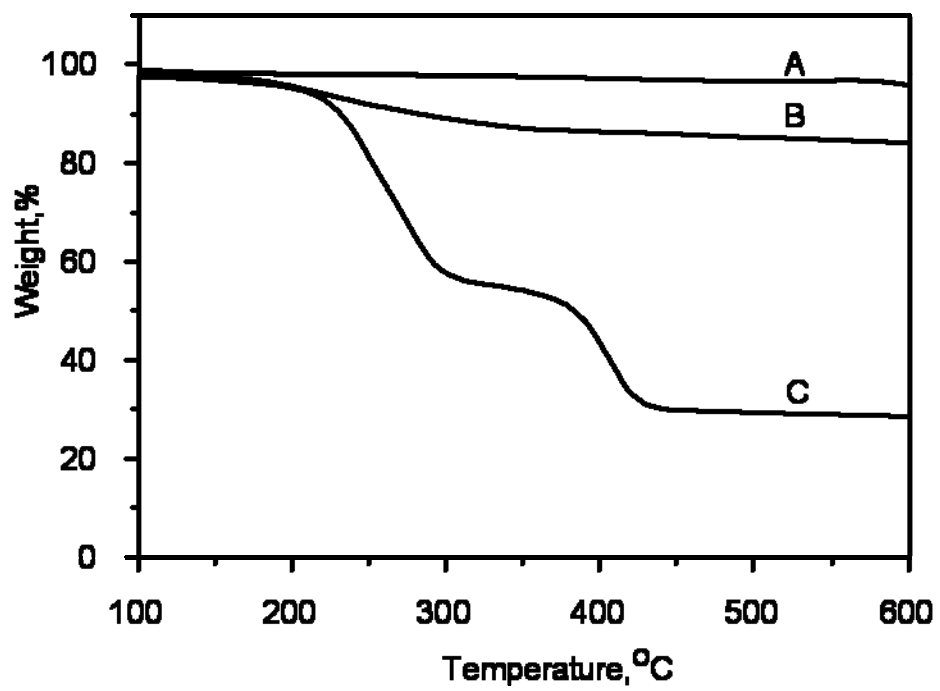

S2

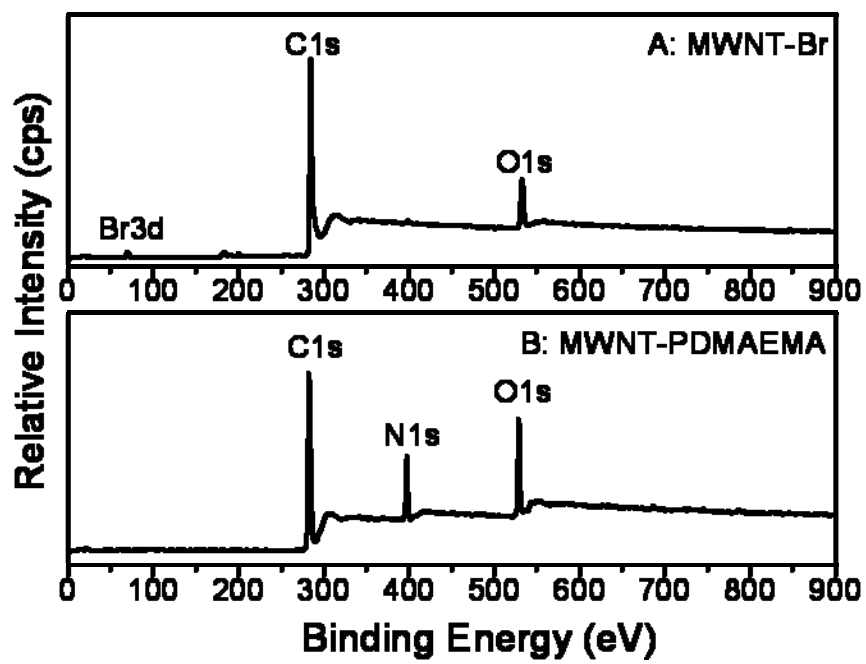

S3

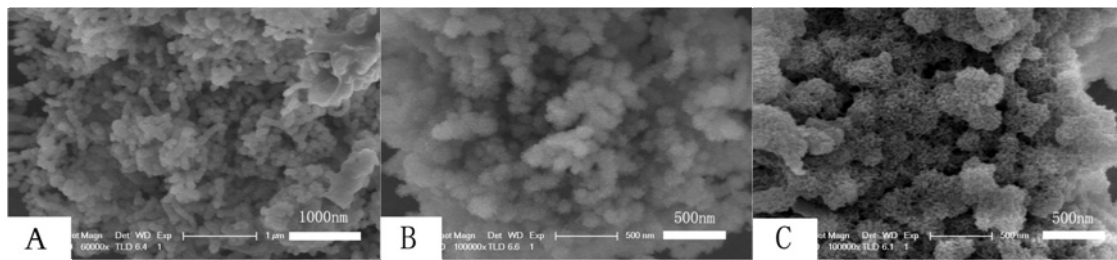

S4

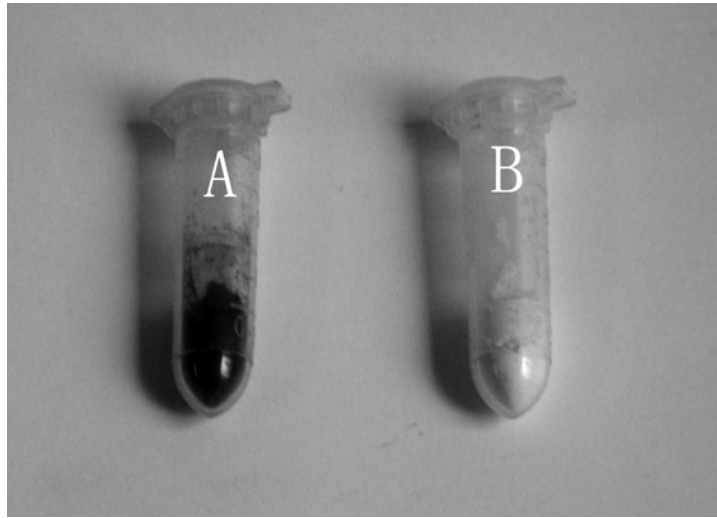

S5
